# Supplementary material for: The retardant effect of 2-Tridecanone, mediated by Cytochrome P450, on the Development of Cotton bollworm, Helicoverpa armigera
Source: PubMed Central journal article supplement (PMC5118896; doi:10.1186/s12864-016-3277-y), 2016-11-22
Supplement: 12864_2016_3277_MOESM1_ESM.pdf [file 12864_2016_3277_MOESM1_ESM.pdf]

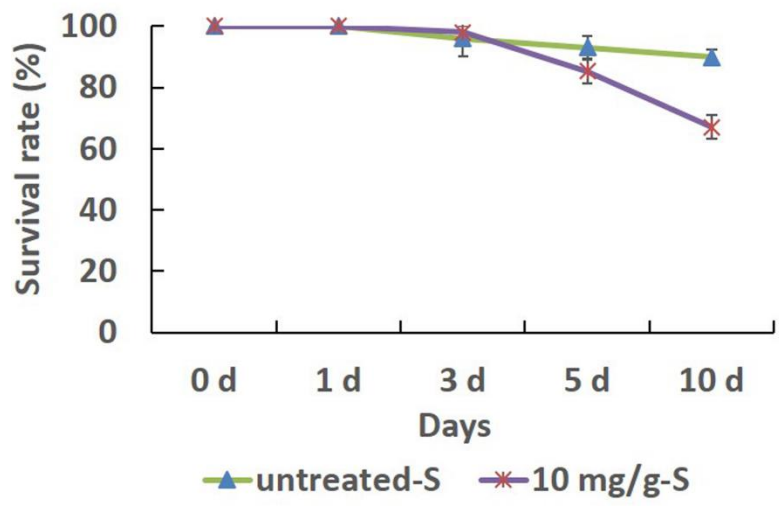

**Figure 6<sup>th</sup> instar larvae treated with 2-TD (10 mg/g).** untreated-S: show the survival rate of the untreated larvae;

10 mg/g-S: show the survival rate of the larvae treated with 10 mg/g 2-TD.
