# Supplementary material for: The retardant effect of 2-Tridecanone, mediated by Cytochrome P450, on the Development of Cotton bollworm, Helicoverpa armigera
Source: PubMed Central journal article supplement (PMC5118896; doi:10.1186/s12864-016-3277-y), 2016-11-22
Supplement: 12864_2016_3277_MOESM3_ESM.pdf [file 12864_2016_3277_MOESM3_ESM.pdf]

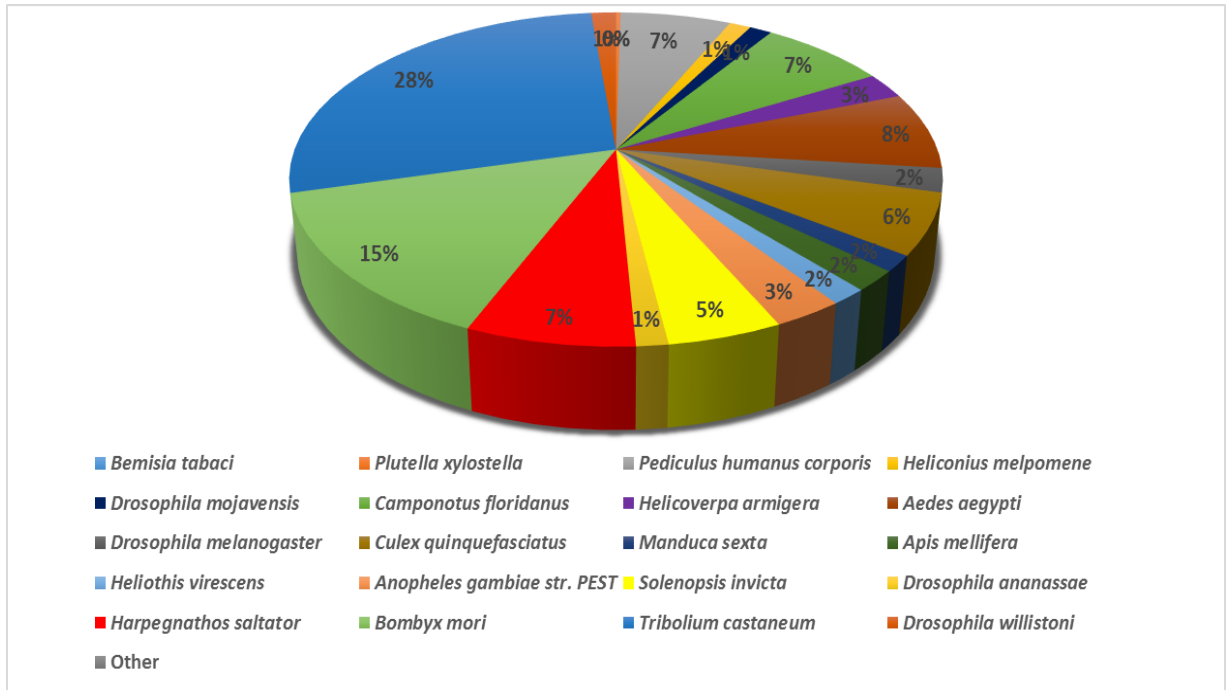

**Fig. S1 Species distribution of the BLASTX results.** This figure shows the species distribution of unigene BLASTX matches against the nr protein database (cutoff value  $e < 10^{-5}$ ).
