# Supplementary material for: The retardant effect of 2-Tridecanone, mediated by Cytochrome P450, on the Development of Cotton bollworm, Helicoverpa armigera
Source: PubMed Central journal article supplement (PMC5118896; doi:10.1186/s12864-016-3277-y), 2016-11-22
Supplement: 12864_2016_3277_MOESM5_ESM.pdf [file 12864_2016_3277_MOESM5_ESM.pdf]

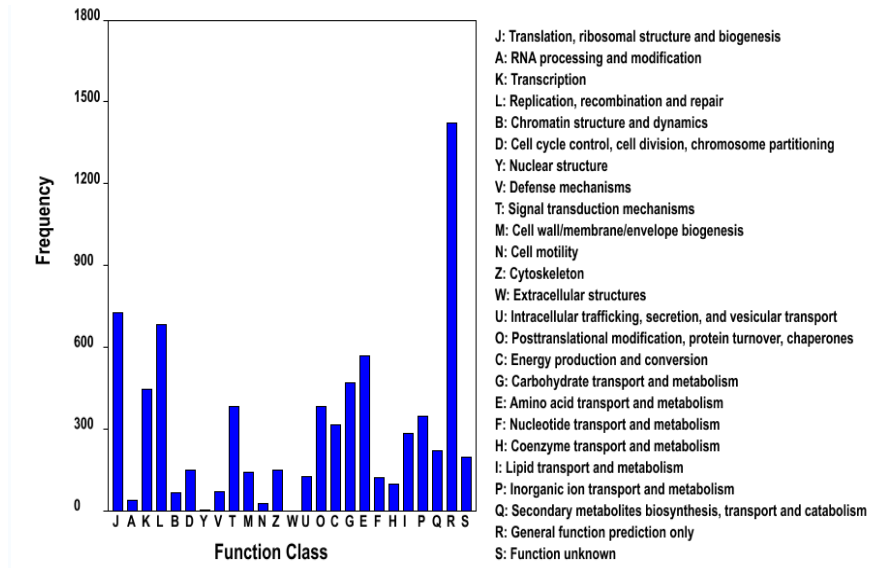

Fig. S2 COG function classification of consensus for the transcriptome of *H. armigera*.
