# Supplementary material for: The retardant effect of 2-Tridecanone, mediated by Cytochrome P450, on the Development of Cotton bollworm, Helicoverpa armigera
Source: PubMed Central journal article supplement (PMC5118896; doi:10.1186/s12864-016-3277-y), 2016-11-22
Supplement: 12864_2016_3277_MOESM9_ESM.pdf [file 12864_2016_3277_MOESM9_ESM.pdf]

## A: Down-regulated

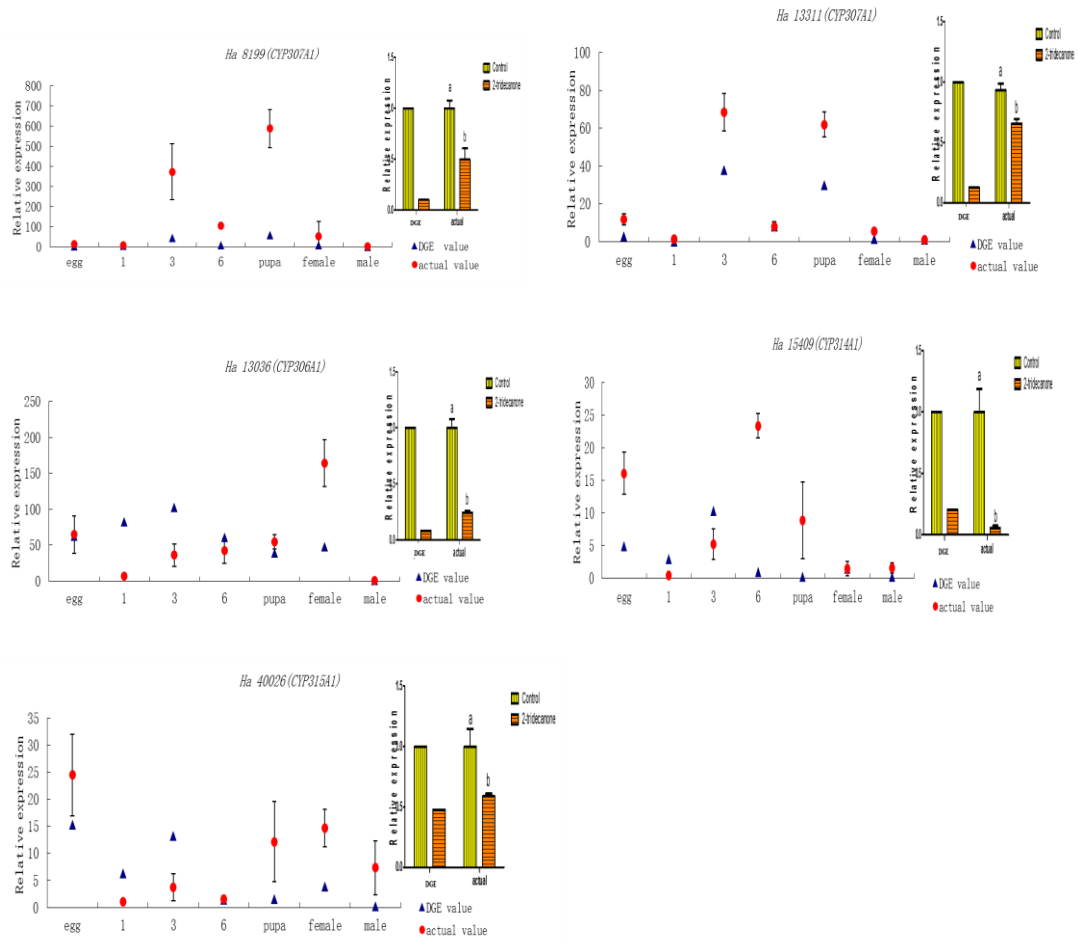

## B: Up-regulated

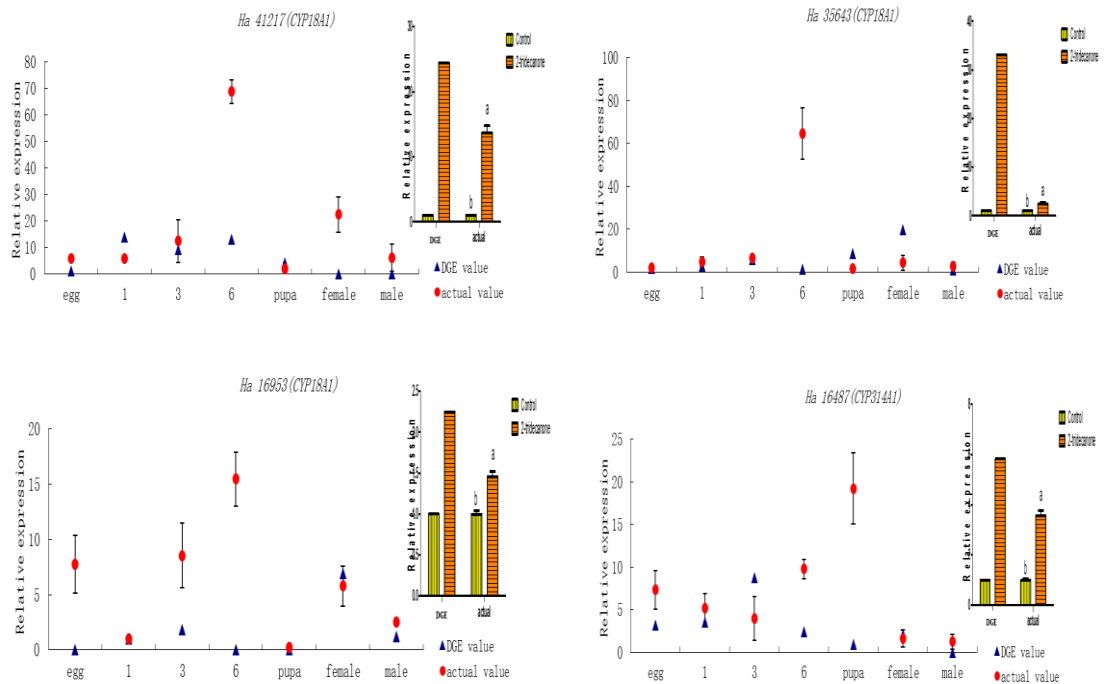

### C: Invariable

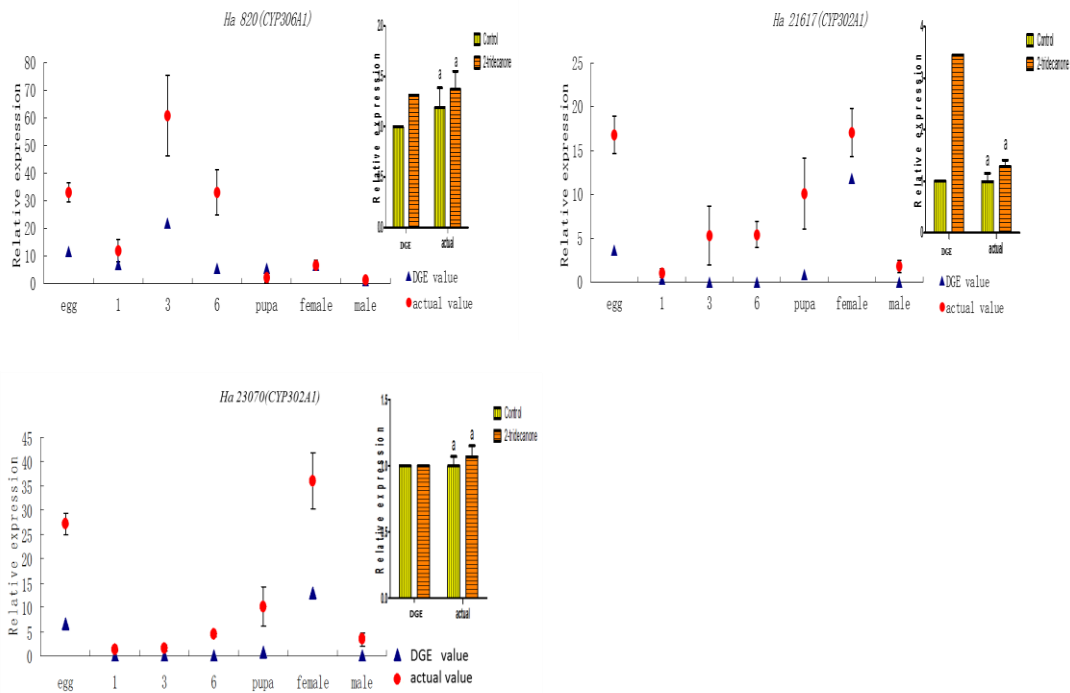

**Fig. S5 Validation of hormone-regulated P450 genes expression by Real Time qPCR.** (A) hormone-regulated P450 genes which were down-regulated by 2-TD. (B) hormone-regulated P450 genes which were up-regulated by 2-TD. (C) hormone-regulated P450 genes which were not significant inducible by 2-TD. 1<sup>st</sup>: first-instar larvae; 3<sup>rd</sup>: third-instar larvae; 6<sup>th</sup>: sixth-instar larvae; Control: sixth-instar larvae not treated with 2-tridecanone; 2-tridecanone: sixth-instar larvae treated with 10mg/g (w:w) 2-tridecanone for 24 hours. DGE values represent the expression of P450 unigene in DGE library; actual values represent the P450 unigene expression by qPCR. Statistical analyses were performed using GraphPad Prism 5.0 software. Statistical significance was determined using a Student's t-test, and p values less than 0.05 were considered as statistically significant. In each unigenes diagram, bars sharing the same letter in each group are not significantly different at  $P > 0.05$ .
