# Supplementary material for: The retardant effect of 2-Tridecanone, mediated by Cytochrome P450, on the Development of Cotton bollworm, Helicoverpa armigera
Source: PubMed Central journal article supplement (PMC5118896; doi:10.1186/s12864-016-3277-y), 2016-11-22
Supplement: 12864_2016_3277_MOESM10_ESM.pdf [file 12864_2016_3277_MOESM10_ESM.pdf]

**A:**

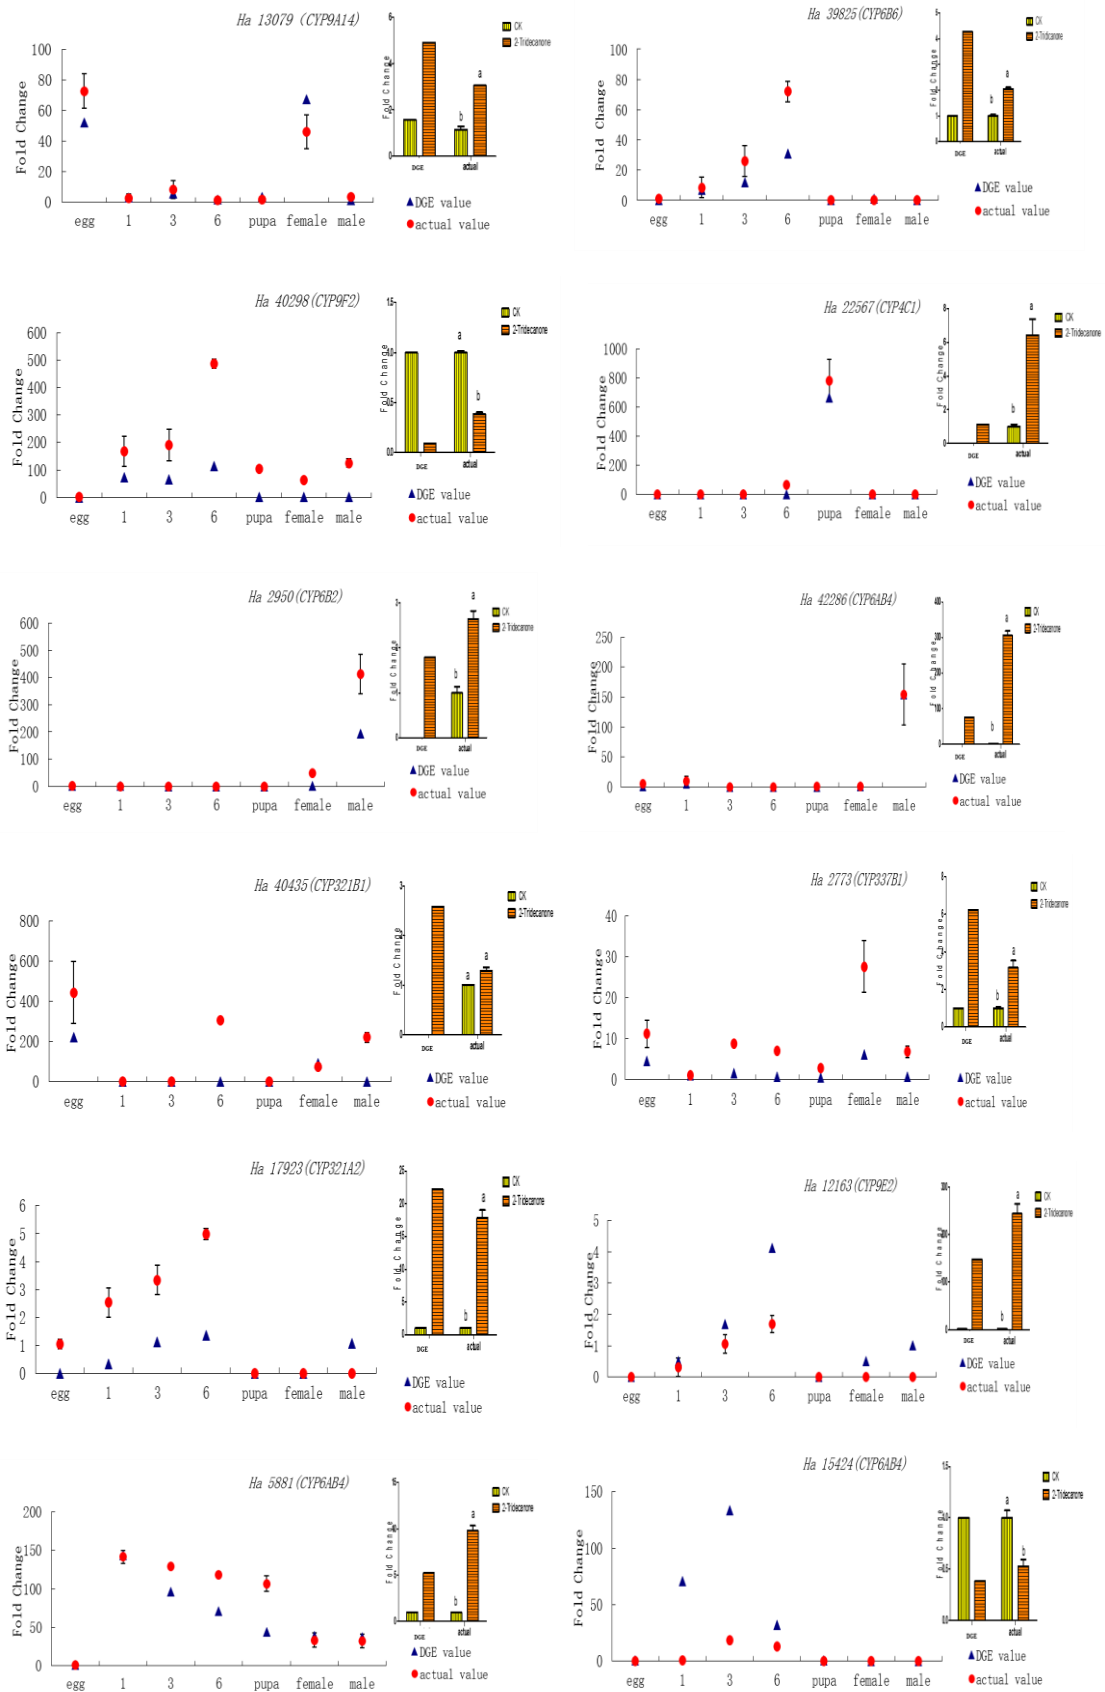

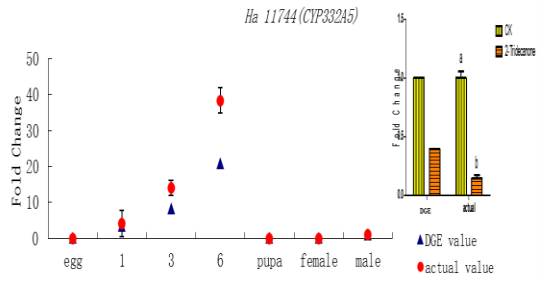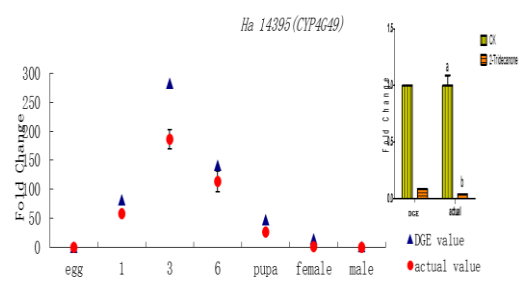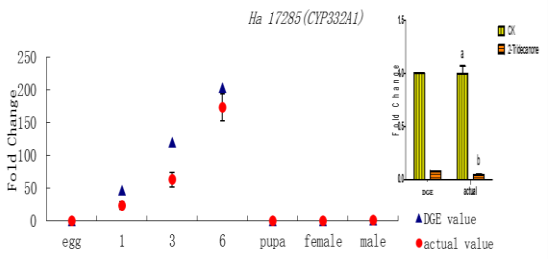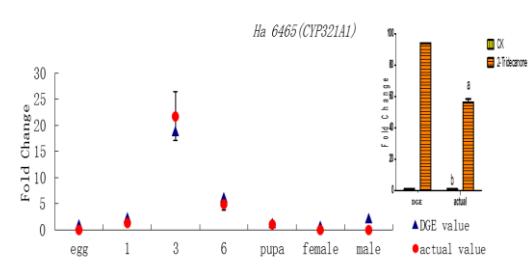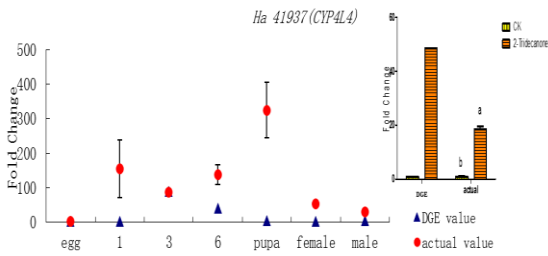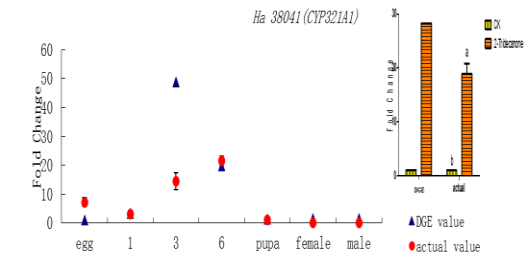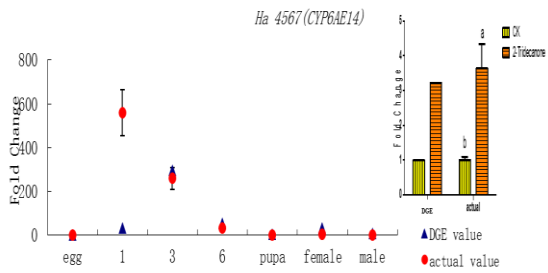

**B:**

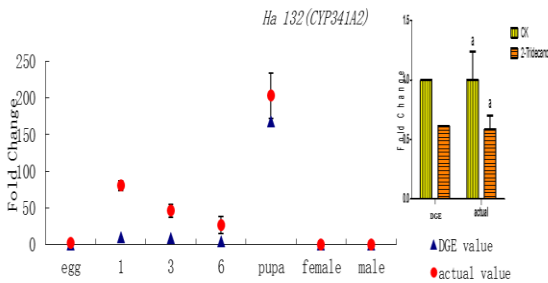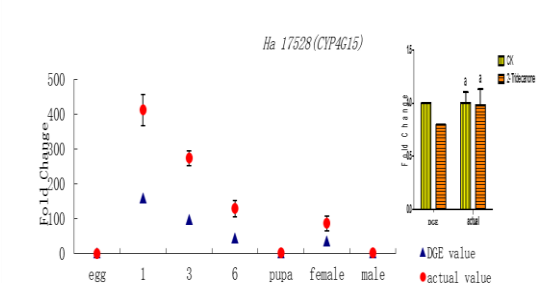

**C:**

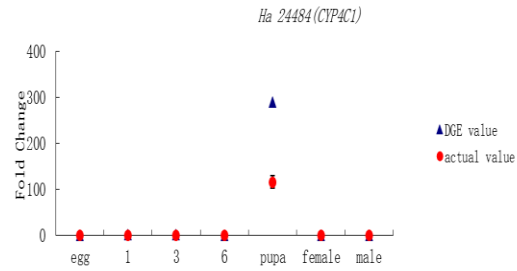

**Fig. S6 Validation of gene expression by RT-PCR** (A) P450 unigenes which were regulated by 2-tridecanone; (B) P450 unigenes which were not significantly induced by 2-tridecanone; (C) P450 unigenes expressed at specific Developmental stages. 1: 1<sup>st</sup> instar larvae; 3: 3<sup>rd</sup> instar larvae; 6: 6<sup>th</sup> instar larvae; CK: control groups. 2-tridecanone: sixth-instar larvae treated with 10mg/g (w:w) 2-tridecanone for 24 hours. DGE values represent the expression of P450 unigene in DGE library; actual values represent the P450 unigene expression by qPCR. Statistical analyses were performed using GraphPad Prism 5.0 software. Statistical significance was determined using a Student's t-test, and the p values less than 0.05 were considered as statistically significant. In each unigenes diagram, bars sharing the same letter for each group are not significantly different at  $P > 0.05$ .
